# Supplementary material for: MMP2 Modulates Inflammatory Response during Axonal Regeneration in the Murine Visual System
Source: MDPI journal article supplement (doi:10.3390/cells10071672), 2021-07-02
Supplement: s1 [file s1]

**Table S1:** Repopulation of myeloid cells in the peripheral blood of transplanted mice. Percentage of CD45.1<sup>+</sup> myeloid cells and CD45.2<sup>+</sup> myeloid cells on the total amount myeloid cells in the peripheral blood shows a repopulation efficiency of over 99%. BM: bone marrow, WT: wild-type.

| Condition                                                  | CD45.1 <sup>+</sup> myeloid cells (%) | CD45.2 <sup>+</sup> myeloid cells (%) |
|------------------------------------------------------------|---------------------------------------|---------------------------------------|
| WT + WT BM                                                 | 99,64±0,09                            | 0,36±0,09                             |
| <i>Mmp2</i> <sup>-/-</sup> + <i>Mmp2</i> <sup>-/-</sup> BM | 0,008±0,004                           | 99,99±0,004                           |
| WT + <i>Mmp2</i> <sup>-/-</sup> BM                         | 99,77±0,11                            | 0.23±0,11                             |
| <i>Mmp2</i> <sup>-/-</sup> + WT BM                         | 0,45±0,13                             | 99,56±0,13                            |

**Table S2:** Primer sequences using SYBR green assays and the optimized annealing temperatures for qRT-PCR of the different genes.

| Gene                          | Forward primer            | Reverse primer         | Annealing temperature (°C) |
|-------------------------------|---------------------------|------------------------|----------------------------|
| <b>Ywhaz</b>                  | CTGACCTACAATGCCTCCATC     | CATCCTGCTGCCATTGCTTA   | 60                         |
| <b>Top1</b>                   | CGTACCTACAATGCCTCCATC     | AGAATTGCAACAGCTCGATTG  | 60                         |
| <b>TNF</b>                    | ACCCTGGTATGAGCCCATATAC    | ACACCCATTCCCTTCACAGAG  | 56                         |
| <b>IL1b</b>                   | CTCTTGTTGATGTGCTGCTG      | GACCTGTTCTTTGAAGTTGACG | 54                         |
| <b>IFN<math>\gamma</math></b> | CCAGGCAGCGTGTCCT          | GTACCTACAATGCCTCCATC   | 58                         |
| <b>IL10</b>                   | AGGAACTCAAGCGGGATATG      | GAGGCTAGATACTGCTCGAT   | 60                         |
| <b>Ym1</b>                    | CAAGTCAAATTCAGAGCATACTTCG | TGAGCTTCAGACTTCGGTGAA  | 60                         |
| <b>iNOS</b>                   | GCGACTGGTGGGAGTTTTG       | AGCACCTCTTCTTGTCCTGTTG | 60                         |
| <b>IL6</b>                    | GCTACACTGGCTACACTCTT      | TCGCCAAGGAGACTCTTTAC   | 60                         |
| <b>CNTF</b>                   | TGGCTAGCAAGGAAGATTCGTT    | CCCATAATGGCTCTCATGTGC  | 60                         |
| <b>MMP2</b>                   | AACTACGATGATGACCGGAAGTG   | TGGCATGGCCGAACTCA      | 60                         |
| <b>GAP43</b>                  | CCACTGATAACTCCCCGTCC      | CTCGGGGTCTTCTTTACCCT   | 60                         |
